# Supplementary material for: Porous metal–organic framework based on a macrocyclic tetracarboxylate ligand exhibiting selective CO2 uptake
Source: Royal Society of Chemistry journal article supplement (doi:10.1039/c2ce25484k), 2012-01-01
Supplement: c2ce25484k.pdf [file c2ce25484k.pdf]

## Electronic Supplementary Information

### Porous Metal-Organic Framework Based on a Macrocyclic Tetracarboxylate Ligand Exhibiting Selective CO<sub>2</sub> Uptake

Wen-Yang Gao,<sup>a</sup> Youhong Niu,<sup>a</sup> Yao Chen,<sup>a</sup> Lukasz Wojtas,<sup>a</sup> Jianfeng Cai,<sup>a</sup> Yu-Sheng  
Chen,<sup>b</sup> and Shengqian Ma<sup>\*a</sup>

<sup>a</sup> Department of Chemistry, University of South Florida, 4202 E. Flower Avenue, Tampa, FL  
33620, USA

<sup>b</sup> ChemMatCARS, Center for Advanced Radiation Sources, The University of Chicago, 9700  
S. Cass Avenue, Argonne, IL 60439, USA

#### **Synthesis of H<sub>4</sub>tactmb:**

The H<sub>4</sub>tactmb ligand was prepared as the following procedures. To a solution of 1,4,7,10-tetracyclododecane (3mmol, 516mmg) and methyl 4-(bromomethyl)benzoate (14.4 mmol, 3.3g) in 200 mL of CH<sub>3</sub>CN, potassium carbonate (4.0g, 29 mmol) was added. The suspension was refluxed for 24h. The solvent was removed, and the residue was partitioned between CH<sub>2</sub>Cl<sub>2</sub> and water, extracted water phase with CH<sub>2</sub>Cl<sub>2</sub> (100 mLx3). The combined organic layer was washed with brine, dried with sodium sulfate, crystallized from mixture solvent of hexane and ethyl acetate to afford product (1.62g, 73%). This solid was dissolved in methanol (100 ml), and a solution of potassium hydroxide (0.94g, 17mmol) in water (5 ml) was added. The solution was refluxed overnight. The volatile was evaporated under reduced

pressure, and the solution was neutralized with HCl (1M). Then precipitated solid was washed thoroughly with deionized water. The solid was collected and lyophilized to give product H<sub>4</sub>tactmb(1.02g, 69%).

### **Synthesis of MMCF-1:**

A mixture of H<sub>4</sub>tactmb (0.003g), Cd(NO<sub>3</sub>)<sub>2</sub>·4H<sub>2</sub>O (0.010g) and 1.0 mL dimethylformamide (DMF) was sealed in a Pyrex tube under vacuum and heated to 105 °C for 48 hours. The resulting colorless block crystals were obtained (yielding: 65% based on the ligand).

### **General method:**

Commercially available reagents were purchased as high purity from Fisher Scientific or Frontier Scientific and used without further purification. Thermogravimetric analysis (TGA) was performed under nitrogen on a TA Instrument TGA 2950 Hi-Res from 30°C to 700 °C at the speed of 10 °C/min.

### **Gas Adsorption Experiments:**

Gas adsorption isotherms of MMCF-1 were collected using the surface area analyzer ASAP-2020. Before the measurements, the freshly prepared samples were washed with methanol, and then activated with supercritical CO<sub>2</sub> in a Tousimis Samdri PVT-3D critical point dryer. CO<sub>2</sub> gas adsorption isotherm was measured at 195K using a liquid acetone-dry ice bath, while CO<sub>2</sub> and N<sub>2</sub> gas adsorption isotherms were measured at 273K using a water-ice bath. CO<sub>2</sub> gas adsorption was also collected at 298K with a water bath.

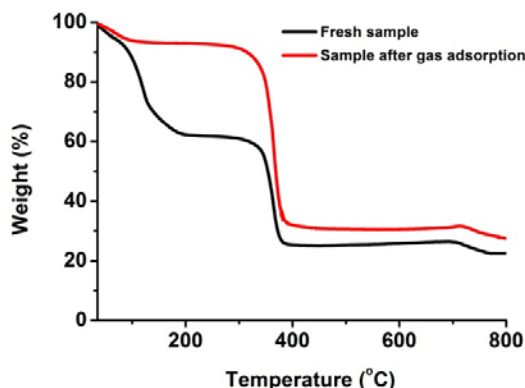

Fig. S1 TGA plots of MMCF-1.

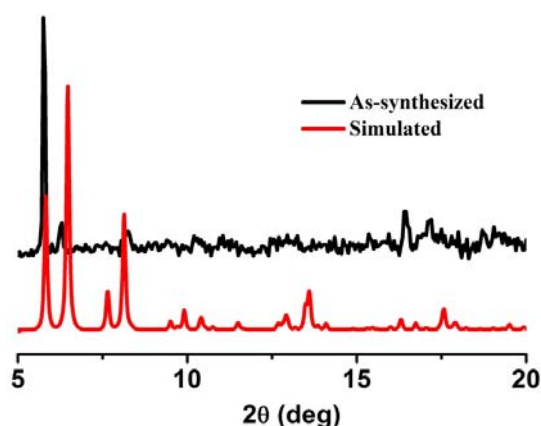

Fig. S2 PXRD patterns of MMCF-1.

### Heat of Adsorption ( $Q_{st}$ ) Calculations.

The virial equation of the form given in Equation (1) was employed to calculate the enthalpies of adsorption for CO<sub>2</sub> on MMCF-1.

$$\ln P = \ln N + 1/T \sum_{i=0}^m a_i N^i + \sum_{i=0}^n b_i N^i \quad (1)$$

where  $P$  is the pressure expressed in Torr,  $N$  is the amount adsorbed in mmol/g,  $T$  is the temperature in K,  $a_i$  and  $b_i$  are virial coefficients, and  $m$  and  $n$  represent the number of coefficients required to adequately describe the isotherms. The equation was fitted by using the least-squares method;  $m$  and  $n$  were gradually increased until the contribution of  $a$  and  $b$  coefficients toward the overall fitting is statistically trivial, as determined by the t-test. The values of the virial coefficients  $a_0 \dots a_m$  were then used to calculate the isosteric heat of adsorption by the following expression:

$$Q_{st} = -R \sum_{i=0}^m a_i N^i \quad (2)$$

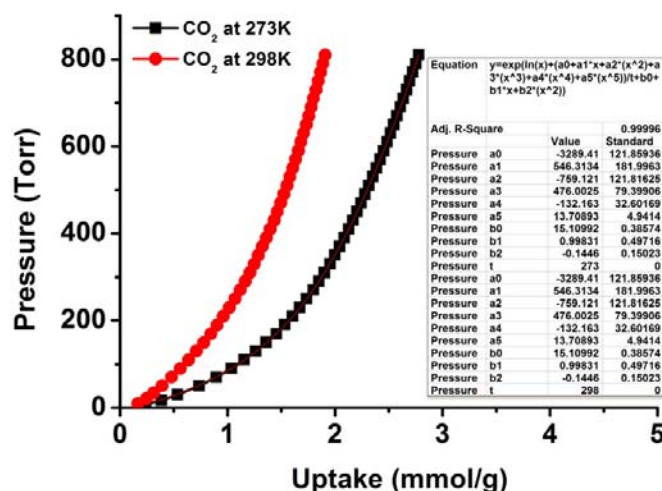

Fig. S2 The plots of virial equation of MMCF-1.

### The Ideal Adsorption Solution Theory (IAST) calculation

The ideal adsorption solution theory (IAST) was utilized to predict the binary mixture composed of CO<sub>2</sub> (15%) and N<sub>2</sub> (85%) from the experimental pure-gas isotherms. Herein the single-component isotherms were fit to the Langmuir equation. The selectivity  $S_{A/B}$  in a binary mixture of component A and B is defined as  $(x_A/y_A)/(x_B/y_B)$ , where  $x_i$  and  $y_i$  are the mole fractions of component  $i$  ( $i=A,B$ ) in the adsorbed and bulk phases respectively.

### Single-Crystal X-ray Diffraction for MMCF-1

The X-ray diffraction data were collected using synchrotron radiation,  $\lambda = 0.49594 \text{ \AA}$ , at Advanced Photon Source, Argonne National Lab, Argonne, IL. Indexing was performed using APEX2 [1] (Difference Vectors method). Data integration and reduction were performed using SAINTplus 6.01 [2]. Absorption correction was performed by multi-scan method implemented in SADABS [3]. Space groups were determined using XPREP implemented in APEX2 [1]. The structure was solved using SHELXS-97 (direct methods) and refined using SHELXL-97 (full-matrix least-squares on  $F^2$ ) contained in APEX2 [1] and WinGX v1.70.01 [4,5,6,7] programs packages. All non-H atoms were found in the Fourier difference map.

SIMU restraints were used to refine the anisotropic displacement parameters of pairs of atoms: C1 and N2, C3 and C4, C17 and O4. Hydrogen atoms were placed in geometrically calculated positions and included in the refinement process using riding model with isotropic thermal parameters:  $U_{iso}(H) = 1.2U_{eq}(-CH)$ . The contribution of heavily disordered solvent molecules was treated as diffuse using Squeeze procedure implemented in Platon program [8, 9]. Crystal data and refinement conditions are shown in Table 1.

| Table S1. Crystal data and structure refinement for MMCF-1 |                                                                                                                                                         |
|------------------------------------------------------------|---------------------------------------------------------------------------------------------------------------------------------------------------------|
| Identification code                                        | MMCF-1                                                                                                                                                  |
| Empirical formula                                          | C <sub>40</sub> H <sub>40</sub> Cd <sub>2</sub> N <sub>4</sub> O <sub>9</sub>                                                                           |
| Formula weight                                             | 945.56                                                                                                                                                  |
| Temperature                                                | 100(2) K                                                                                                                                                |
| Wavelength                                                 | 0.49594 Å                                                                                                                                               |
| Crystal system, space group                                | Monoclinic, <i>P</i> 21/ <i>c</i>                                                                                                                       |
| Unit cell dimensions                                       | <i>a</i> = 17.8372(19) Å <i>alpha</i> = 90 deg.<br><i>b</i> = 21.164(2) Å <i>beta</i> = 90.300(2) deg.<br><i>c</i> = 21.721(2) Å <i>gamma</i> = 90 deg. |
| Volume                                                     | 8199.7(15) Å <sup>3</sup>                                                                                                                               |
| Z, Calculated density                                      | 4, 0.766 Mg/m <sup>3</sup>                                                                                                                              |
| Absorption coefficient                                     | 0.181 mm <sup>-1</sup>                                                                                                                                  |
| F(000)                                                     | 1904                                                                                                                                                    |
| Crystal size                                               | 0.05 x 0.02 x 0.01 mm                                                                                                                                   |
| Theta range for data collection                            | 0.80 to 18.13 deg.                                                                                                                                      |
| Limiting indices                                           | -22 ≤ <i>h</i> ≤ 22, -21 ≤ <i>k</i> ≤ 24, -26 ≤ <i>l</i> ≤ 21                                                                                           |
| Reflections collected / unique                             | 91148 / 16212 [R(int) = 0.0648]                                                                                                                         |
| Completeness to theta = 18.13                              | 95.5 %                                                                                                                                                  |
| Absorption correction                                      | Semi-empirical from equivalents                                                                                                                         |
| Max. and min. transmission                                 | 0.9982 and 0.9910                                                                                                                                       |
| Refinement method                                          | Full-matrix least-squares on F <sup>2</sup>                                                                                                             |
| Data / restraints / parameters                             | 16212 / 18 / 497                                                                                                                                        |
| Goodness-of-fit on F <sup>2</sup>                          | 1.031                                                                                                                                                   |
| Final R indices [I > 2σ(I)]                                | R1 = 0.0725, wR2 = 0.1930                                                                                                                               |
| R indices (all data)                                       | R1 = 0.1012, wR2 = 0.2019                                                                                                                               |
| Largest diff. peak and hole                                | 1.397 and -1.569 e.Å <sup>-3</sup>                                                                                                                      |

## References.

- [1] Bruker (2010). *APEX2*. Bruker AXS Inc., Madison, Wisconsin, USA.
- [2] Bruker (2009). SAINT. Data Reduction Software. Bruker AXS Inc., Madison, Wisconsin, USA.
- [3] Sheldrick, G. M. (2008). *SADABS. Program for Empirical Absorption Correction*. University of Gottingen, Germany.
- [4] Farrugia L.J. Appl. Cryst. (1999). 32, 837.
- [5] Sheldrick, G.M. (1997). SHELXL-97. Program for the Refinement of Crystal
- [6] Sheldrick, G.M. (1990). Acta Cryst. A46, 467.
- [7] Sheldrick, G. M. (2008). Acta Cryst. A64, 112.
- [8] Spek, T.L., Acta Cryst. (1990). A46, 194.
- [9] Spek, T.L., Acta Cryst. (1990). A46, c34.
